# Supplementary material
Source: publisher site journal article supplement (https://www.dovepress.com/get_supplementary_file.php?f=341571.docx)
Supplement: Supplementary file 1 [file get_supplementary_file.php]

**Table S1** List of resistance genes, primer sequences, and PCR parameters

| Gene | Forward and reverse primer sequences (5′–3′) | PCR Condition | Cycles | Product size | Reference |
| --- | --- | --- | --- | --- | --- |
| *cep*A | TTTCTGCTATGTCCTGCCT  ATCTTTCACGAAGACGGC | 95 °C 15 s, 56 °C 30 s, 72 °C 60 s | 35 | 780 bp | 1 |
| *cfx*A | GCTCAAACAGATAGTTTTAT  GGCAACATTGTGAGCTG | 98 °C 10 s, 60 °C 30 s, 68 °C 60 s | 30 | 333 bp | 2 |
| *cfi*A | AATCGAAGGATGGGGTATGG  CGGTCAGTGAATCGGTGAAT | 94 °C 15 s, 59 °C 60 s, 72 °C 30 s | 40 | 302 bp | 1 |
| *tet*Q | GGCTTCTACGACATCTATTA  CATCAACATTTATCTCTCTG | 98 °C 10 s, 54 °C 60 s, 72 °C 120 s | 35 | 758 bp | 3 |
| *tet*X | TTAGCCTTACCAATGGGTGT  CAAATCTGCTGTTTCACTCG | 94 °C 15 s, 55 °C 30 s, 72 °C 30 s | 35 | 243 bp | 3 |
| *tet*X1 | TCAGGACAAGAAGCAATGAA  TATTTCGGGGTTGTCAAACT | 94 °C 10 s, 63 °C 30 s, 72 °C 30 s | 35 | 150 bp | 3 |
| *tet*36 | TTTCTGGCAGAGGTAGAACG  TTAATTCCTTGCCTTCAACG | 95 °C 15 s, 57 °C 30 s, 72 °C 30 s | 35 | 250 bp | 4 |
| *tet*M | GTGGACAAAGGTACAACGAG  CGGTAAAGTTCGTCACACAC | 94 °C 60 s, 55 °C 60 s, 72 °C 90 s | 35 | 406 bp | 5 |
| *erm*B | GAAAAGGTACTCAACCAATA  AGTAACGGTACTTAAATTGTTTAC | 98 °C 10 s, 49 °C 60 s, 72 °C 120 s | 35 | 639 bp | 6 |
| *erm*F | CGGGTCAGCACTTTACTATTG  GGACCTACCTCATAGACA AG | 98 °C 10 s, 50 °C 30 s, 68 °C 60 s | 35 | 466 bp | 7 |
| *erm*G | ATAGGTGCAGGGAAAGGTCA  TGGATTGTGGCTAGGAAATGT | 95 °C 15 s, 59 °C 30 s, 72 °C 30 s | 35 | 177 bp | 4 |
| *mef*A | AGTATCATTAATCACTAGTGC  TTCTTCTGGTACTAAAAGTGG | 98 °C 10 s, 53 °C 60 s, 72 °C 120 s | 35 | 348 bp | 6 |
| *bex*A | TAGTGGTTGCTGCGATTCTG  TCAGCGTCTTGGTCTGTGTC | 95 °C 15 s, 60 °C 30 s, 72 °C 30 s | 35 | 195 bp | 4 |
| *lin*A | CTGGGGAGTGGATGTCTTGT  AGTTGGCTTGTTTGGAAGTG | 95 °C 15 s, 60 °C 30 s, 72 °C 30 s | 35 | 230 bp | 4 |
| *msr*SA | GGGAACTGAAAGATGGCAAA  TACGAGCCTGTTTTCGCTTT | 95 °C 15 s, 60 °C 30 s, 72 °C 30 s | 35 | 165 bp | 4 |
| *nim* | ATGTTCAGAGAAATGCGGCGTAACG  GCTTCCTTGCCTGTCATGTGCTC | 94 °C 30 s, 62 °C 60 s, 72 °C 60 s | 35 | 458 bp | 8 |
| *qnr*A | TCAGCAAGAGGATTTCTCA  GGCAGCACTATTACTCCCA | 94 °C 45 s, 53 °C 45 s, 72 °C 60 s | 32 | 627 bp | 9 |
| *qnr*B | GGMATHGAAATTCGCCACTG  TTTGCYGYYCGCCAGTCGAA | 94 °C 60 s, 54 °C 60 s, 72 °C 60 s | 35 | 264 bp | 10 |
| *qnr*S | GCAAGTTCATTGAACAGGGT  TCTAAACCGTCGAGTTCGGCG | 94 °C 45 s, 54 °C 45 s, 72 °C 60 s | 35 | 428 bp | 11 |
| *cat*A | AAGTTGGCAGCATTCACCCG  TCGTGGTATTCACTCCAGAGCG | 94 °C 60 s, 61 °C 30 s, 72 °C 60 s | 35 | 573 bp | 12 |
| IS1186 | GAGAATCAAGCTTCTCGCC | 94 °C 30 s, 48 °C 60 s, 72 °C 60 s | 35 | 1.3 kb | 13 |
| CCCCGAATTCGCCTTTGCCCGTA |
| IS1187 | CGTATTGCAGAATGGTAAGTGC | 94 °C 30 s, 48 °C 60 s, 72 °C 60 s | 35 | 725 bp | 14 |
| GTTCCACGTCGTGGTCCTGTTC |
| IS942 | TCTGAGAAACTCACTCCTTTTGGAGGA | 94 °C 30 s, 48 °C 60 s, 72 °C 60 s | 35 | 1.3 kb | 15 |
| AGAAAAGCATGGTCTTTAACCAAAGTC |

c*epA*, *cfxA*, *cfiA*: β-lactamase resistance genes

*ermB*, *ermF*, *ermG*, *limA*, *mefA*, *msrSA*: macrolide–lincomycin–streptogramin (MLS) resistance genes

*tetM*, *tetQ*, *tetX*, *tetX1, tet36*: tetracycline resistance genes

*bexA*, *qnrA*, *qnrB*, *qnrS* are quinolone resistance genes

*nim*: metronidazole resistance genes

*catA*:chloramphenicol resistance gene

IS1186, IS1187, IS942: Insert sequences

**References**

1. Gutacker M, Valsangiacomo C, Piffaretti J-C. Identification of two genetic groups in Bacteroides fragilis by multilocus enzyme electrophoresis: distribution of antibiotic resistance (cfiA, cepA) and enterotoxin (bft) encoding genesThe GenBank accession numbers for the sequences determined in this work are AF197508–AF197534. *Microbiology.* 2000;146(5):1241-1254.

2. Tran CM, Tanaka K, Watanabe K. PCR-based detection of resistance genes in anaerobic bacteria isolated from intra-abdominal infections. *J Infect Chemother.* 2013;19(2):279-290.

3. Bartha NA, Soki J, Urban E, Nagy E. Investigation of the prevalence of tetQ, tetX and tetX1 genes in Bacteroides strains with elevated tigecycline minimum inhibitory concentrations. *Int J Antimicrob Agents.* 2011;38(6):522-525.

4. Eitel Z, Sóki J, Urbán E, Nagy E. The prevalence of antibiotic resistance genes in Bacteroides fragilis group strains isolated in different European countries. *Anaerobe.* 2013;21:43-49.

5. Ng LK, Martin I, Alfa M, Mulvey M. Multiplex PCR for the detection of tetracycline resistant genes. *Mol Cell Probes.* 2001;15(4):209-215.

6. Sutcliffe J, Grebe T, Tait-Kamradt A, Wondrack L. Detection of erythromycin-resistant determinants by PCR. *Antimicrobial agents and chemotherapy.* 1996;40(11):2562-2566.

7. Paula GR, Falcão LS, Antunes ENF, et al. Determinants of resistance in Bacteroides fragilis strains according to recent Brazilian profiles of antimicrobial susceptibility. *International Journal of Antimicrobial Agents.* 2004;24(1):53-58.

8. Nakano V, Nascimento e Silva A, Merino VR, Wexler HM, Avila-Campos MJ. Antimicrobial resistance and prevalence of resistance genes in intestinal Bacteroidales strains. *Clinics (Sao Paulo, Brazil).* 2011;66(4):543-547.

9. Wang M, Sahm DF, Jacoby GA, Hooper DC. Emerging plasmid-mediated quinolone resistance associated with the qnr gene in Klebsiella pneumoniae clinical isolates in the United States. *Antimicrobial agents and chemotherapy.* 2004;48(4):1295-1299.

10. Cattoir V, Weill FX, Poirel L, Fabre L, Soussy CJ, Nordmann P. Prevalence of qnr genes in Salmonella in France. *J Antimicrob Chemother.* 2007;59(4):751-754.

11. Cattoir V, Poirel L, Rotimi V, Soussy CJ, Nordmann P. Multiplex PCR for detection of plasmid-mediated quinolone resistance qnr genes in ESBL-producing enterobacterial isolates. *J Antimicrob Chemother.* 2007;60(2):394-397.

12. Maidhof H, Guerra B, Abbas S, Elsheikha HM, Whittam TS, Beutin L. A multiresistant clone of Shiga toxin-producing Escherichia coli O118:[H16] is spread in cattle and humans over different European countries. *Appl Environ Microbiol.* 2002;68(12):5834-5842.

13. Podglajen I, Breuil J, Collatz E. Insertion of a novel DNA sequence, 1S1186, upstream of the silent carbapenemase gene cfiA, promotes expression of carbapenem resistance in clinical isolates of Bacteroides fragilis. *Mol Microbiol.* 1994;12(1):105-114.

14. Podglajen I, Breuil J, Rohaut A, Monsempes C, Collatz E. Multiple mobile promoter regions for the rare carbapenem resistance gene of Bacteroides fragilis. *J Bacteriol.* 2001;183(11):3531-3535.

15. Rasmussen BA, Kovacs E. Identification and DNA sequence of a new Bacteroides fragilis insertion sequence-like element. *Plasmid.* 1991;25(2):141-144.

**Table S2** Recent publications on *Bacteroides* *fragilis* group isolations from human samples

| **Country** | **Number of isolations (n)** | ***B. fragilis***  **n (%)** | **Non-fragilis *Bacteroides***  **n (%)** | **Source of samples** | **Type of samples** | **Published year** | **Reference** |
| --- | --- | --- | --- | --- | --- | --- | --- |
| European countries | 824 | 600 (72.8) | 224 (27.2) | Clinical | Various, except faeces | 2010 | 1 |
| Japan | 64 | 21 (32.8) | 43 (67.2) | Clinical | Intra-abdominal infection | 2013 | 2 |
| Japan | 69 | 32 (46.4) | 37 (53.6) | Clinical | Intra-abdominal infection | 2018 | 3 |
| Dutch | 101 | 38 (37.6) | 63 (62.4) | Clinical | Various | 2019 | 4 |
| China | 115 | 80 (69.6) | 35 (30.4) | Clinical | Various, except faeces | 2020 | 5 |
| Germany | 71 | 40 (56.3) | 31 (43.7) | Clinical | N/A | 2021 | 6 |
| Brazil | 64 | 39 (60.9) | 25(39.1) | Clinical, children with diarrhea | Fecal samples | 2004 | 7 |
| 50 | 27 (54) | 23 (46) | Healthy children | Fecal samples |
| Brazil | 25 | 25 (100) | 0 | Clinical | N/A | 2010 | 8 |
| 35 | 26 (74.3) | 9 (25.7) | Healthy people | Human intestinal microﬂora |
| Iran | 177 | 53 (29.9) | 124 (70.1) | Healthy people | Human intestinal microﬂora | 2016 | 9 |
| Poland | 33 | 20 (60.6) | 13 (39.4) | Healthy people | Human intestinal microﬂora | 2019 | 10 |
| Vietnama | 76 | 3 (3.9) | 73 (96.1) | Healthy people | Human intestinal microﬂora | 2021 | Present study |
| Japanb | 63 | 9 (14.3) | 54 (85.7) |

The different in percentage of *B. fragilis* and non-fragilis *Bacteroides* in a and b had *P -* value of 0.0307.

NA, not applicable

**References**

1. Nagy E, Urban E, Nord CE, Bacteria ESGoARiA. Antimicrobial susceptibility of Bacteroides fragilis group isolates in Europe: 20 years of experience. *Clin Microbiol Infect.* 2011;17(3):371-379.

2. Tran CM, Tanaka K, Watanabe K. PCR-based detection of resistance genes in anaerobic bacteria isolated from intra-abdominal infections. *J Infect Chemother.* 2013;19(2):279-290.

3. Takesue Y, Kusachi S, Mikamo H, et al. Antimicrobial susceptibility of common pathogens isolated from postoperative intra-abdominal infections in Japan. *J Infect Chemother.* 2018;24(5):330-340.

4. Veloo ACM, Baas WH, Haan FJ, Coco J, Rossen JW. Prevalence of antimicrobial resistance genes in Bacteroides spp. and Prevotella spp. Dutch clinical isolates. *Clin Microbiol Infect.* 2019;25(9):1156 e1159-1156 e1113.

5. Wang Y, Han Y, Shen H, Lv Y, Zheng W, Wang J. Higher Prevalence of Multi-Antimicrobial Resistant Bacteroides spp. Strains Isolated at a Tertiary Teaching Hospital in China. *Infection and drug resistance.* 2020;13:1537-1546.

6. Rong SMM, Rodloff AC, Stingu CS. Diversity of antimicrobial resistance genes in Bacteroides and Parabacteroides strains isolated in Germany. *J Glob Antimicrob Resist.* 2021;24:328-334.

7. Nakano V, Avila-Campos MJ. Survey of antimicrobial susceptibility patterns of the bacteria of the Bacteroides fragilis group isolated from the intestinal tract of children. *Mem Inst Oswaldo Cruz.* 2004;99(3):319-324.

8. Boente RF, Ferreira LQ, Falcao LS, et al. Detection of resistance genes and susceptibility patterns in Bacteroides and Parabacteroides strains. *Anaerobe.* 2010;16(3):190-194.

9. Narimani T, Douraghi M, Owlia P, et al. Heterogeneity in resistant fecal Bacteroides fragilis group collected from healthy people. *Microb Pathog.* 2016;95:1-6.

10. Niestepski S, Harnisz M, Korzeniewska E, et al. The emergence of antimicrobial resistance in environmental strains of the Bacteroides fragilis group. *Environ Int.* 2019;124:408-419.

**Table S3A** Distribution of MLS-resistancegenes in clindamycin-resistant and non-resistant BFG

| Resistant genes | | Resistant (a) | Non-resistant (b) | *P*- value (a and b) |
| --- | --- | --- | --- | --- |
| *erm*F | Vietnam | 30 | 2 | 0.007 |
| Japan | 20 | 8 | 0.47 |
| *erm*G | Vietnam | 3 | 2 | 0.28 |
| Japan | 14 | 19 | 0.44 |
| *lin*A | Vietnam | 16 | 12 | < 0.001 |
| Japan | 7 | 3 | 0.81 |
| *mef*A | Vietnam | 2 | 0 | 0.46 |
| Japan | 7 | 2 | 0.45 |
| *msr*SA | Vietnam | 0 | 0 | - |
| Japan | 3 | 1 | 0.72 |

BFG, *Bacteroides fragilis* group; MLS, macrolide–lincomycin–streptogramin

**Table S3B** Number of strains with resistance genes and their combinations among *Bacteroides* strains with different clindamycin MICs

| MIC (μg/mL) of clindamycin | None | | *ermF* | | *ermG* | | *linA* | | *mefA* | | *ermF, ermG* | | *ermF, linA* | | *ermF, mefA* | | *ermG, linA* | | *ermG,*  *mefA* | | *ermG, msrSA* | | *mefA, msrSA* | | *ermF, ermG, linA* | | *ermF, ermG, mefA* | | *ermF, linA, mefA* | | *ermG, linA, mefA* | | *ermG, mefA, msrSA* | | *linA, mefA, msrSA* | |
| --- | --- | --- | --- | --- | --- | --- | --- | --- | --- | --- | --- | --- | --- | --- | --- | --- | --- | --- | --- | --- | --- | --- | --- | --- | --- | --- | --- | --- | --- | --- | --- | --- | --- | --- | --- | --- |
| Va | Jb | V | J | V | J | V | J | V | J | V | J | V | J | V | J | V | J | V | J | V | J | V | J | V | J | V | J | V | J | V | J | V | J | V | J |
| <0.015 |  |  |  | 1 |  |  |  |  |  |  |  |  |  |  |  |  |  |  |  |  |  |  |  |  |  |  |  |  |  |  |  |  |  |  |  |  |
| 0.03 |  | 2 |  | 1 |  |  | 1 |  |  |  |  |  |  |  |  |  |  |  |  |  |  |  |  |  |  |  |  |  |  |  |  |  |  |  |  |  |
| 0.06 |  |  |  |  |  | 1 | 3 |  |  |  |  |  |  |  |  |  |  |  |  |  |  |  |  |  |  |  |  |  |  |  |  |  |  |  |  |  |
| 0.125 |  |  |  |  |  |  |  |  |  |  |  |  | 1 |  |  |  |  |  |  |  |  |  |  |  |  |  |  |  |  |  |  |  |  |  |  |  |
| 0.25 | 1 |  |  |  |  |  |  |  |  |  |  | 1 |  |  |  |  |  |  |  |  |  |  |  | 1 |  |  |  |  |  |  |  |  |  |  |  |  |
| 0.5 |  | 1 |  |  |  | 1 |  |  |  |  |  |  |  |  |  |  |  |  |  |  |  |  |  |  |  |  |  |  |  |  |  |  |  |  |  |  |
| 1 |  | 4 |  | 1 |  |  | 1 | 2 |  |  |  |  |  |  |  |  |  |  |  |  |  |  |  |  |  |  |  |  |  |  |  |  |  |  |  |  |
| 2 |  | 4 |  | 1 | 1 |  | 2 |  |  |  |  |  |  | 1 |  |  |  |  |  |  |  |  |  |  |  |  |  |  |  |  |  |  |  |  |  |  |
| 4 | 1 | 2 | 1 |  |  | 1 | 3 |  |  |  |  | 1 |  |  |  | 1 | 1 |  |  |  |  |  |  |  |  |  |  |  |  |  |  |  |  |  |  |  |
| 8 | 2 |  |  |  |  | 1 | 1 |  |  |  |  | 2 |  |  |  |  |  |  |  |  |  |  |  |  |  |  |  |  |  |  |  |  |  |  |  |  |
| 16 |  |  |  |  |  |  | 1 |  |  |  |  |  |  |  |  |  |  |  |  |  |  |  |  |  |  |  |  |  |  |  |  |  |  |  |  |  |
| 32 |  |  |  |  |  | 1 |  |  |  |  |  |  |  |  |  |  |  |  |  |  |  |  |  |  |  |  |  |  |  |  |  |  |  |  |  |  |
| 64 |  |  |  | 1 |  |  |  |  |  |  |  |  |  |  |  |  |  |  |  |  |  |  |  |  |  |  |  |  |  |  |  |  |  |  |  |  |
| 128 |  | 1 |  |  |  |  |  |  |  |  |  |  |  |  |  |  |  |  |  |  |  |  |  |  |  |  |  |  |  |  |  |  |  |  |  |  |
| >128 | 20 | 2 | 20 | 13 | 1 | 3 | 4 |  |  | 1 |  |  | 7 | 2 | 1 |  | 2 | 2 |  | 1 |  | 1 |  |  | 1 |  |  | 1 | 1 |  |  | 1 |  | 1 |  | 1 |
| **Total** | **24** | **16** | **21** | **18** | **2** | **8** | **16** | **2** |  | **1** |  | **4** | **8** | **3** | **1** | **1** | **3** | **2** |  | **1** |  | **1** |  | **1** | **1** |  |  | **1** | **1** |  |  | **1** |  | **1** |  | **1** |

a: Vietnam

b: Japan

MIC, minimum inhibitory concentration; J, Japan; V, Vietnam

**Table S4** Examples of diversity in susceptibility distribution of BFG isolations to clindamycin, clarithromycin, and erythromycin

| **Code** | **Species** | **Source** | **Clindamycin**  **MIC (µg/mL)** | **Clarithromycin**  **MIC (µg/mL)** | **Erythromycin**  **MIC (µg/mL)** |
| --- | --- | --- | --- | --- | --- |
| GAI17240 | *B. stercoris* | Vietnam | 4 | 1 | 16 |
| GAI17258 | *B. stercoris* | Vietnam | 2 | 1 | 32 |
| GAI17268 | *B. stercoris* | Vietnam | 2 | 1 | 32 |
| GAI17273 | *P. distasonis* | Vietnam | 4 | 1 | 32 |
| GAI17280 | *B. stercoris* | Vietnam | 4 | 1 | 64 |
| GAI17301 | *P. distasonis* | Vietnam | >128 | >128 | 32 |
| GAI20062 | *P. distasonis* | Japan | 0.03 | 2 | 32 |
| GAI20078 | *B. ovatus* | Japan | 1 | 128 | 16 |
| GAI20103 | *B. ovatus* | Japan | 2 | 32 | 128 |
| GAI20125 | *B. vulgatus* | Japan | 32 | 0.5 | >128 |
| GAI20154 | *P. merdae* | Japan | >128 | >128 | 16 |

**Figure S1**: The distribution of fluoroquinolone-resistance genes *(bex*A*, qnr*B*, qnr*S*)* found in *Bacteroides* strains in Vietnam and Japan based on levofloxacin and ciprofloxacin MIC values.

MIC, minimum inhibitory concentration; VN, Vietnam; JP, Japan
